# Supplementary material
Source: publisher figshare collection journal article supplement (https://geolsoc.figshare.com/ndownloader/files/24716472)
Supplement: Supplementary file 1 [file 24716472]

## Sheet: Chemical Data Gravatá
Matrix - Plagioclase	1		2		3		4		5
	Core	Rim	Core	Rim	Core	Rim	Core	Rim	Core	Rim
SiO2	65.249	65.637	64.564	64.477	66.691	65.46	66.421	66.371	65.903	66.241
TiO2	0.107	b.d.l.	0.103	b.d.l.	b.d.l.	0.019	0.277	0.146	b.d.l.	0.045
Al2O3	19.692	18.885	18.628	19.577	18.626	19.063	19.116	18.941	19.127	18.895
Cr2O3	b.d.l.	b.d.l.	b.d.l.	b.d.l.	b.d.l.	b.d.l.	b.d.l.	b.d.l.	0.06	0.05
FeO	b.d.l.	0.071	0.019	0.015	0.037	0.041	0.07	0.197	b.d.l.	0.137
MnO	b.d.l.	b.d.l.	b.d.l.	b.d.l.	b.d.l.	b.d.l.	b.d.l.	b.d.l.	b.d.l.	0.099
MgO	b.d.l.	b.d.l.	b.d.l.	0.019	0.015	b.d.l.	b.d.l.	0.016	0.018	b.d.l.
CaO	1.68	0.856	1.107	1.949	0.343	0.879	0.923	1.015	0.795	0.488
Na2O	10.582	10.35	9.879	10.086	11.033	10.618	11.111	10.874	11.622	11.081
K2O	0.246	0.884	1.449	0.639	0.394	0.688	0.189	0.702	0.266	0.907
Total	97.561	96.683	95.749	96.762	97.139	96.768	98.107	98.262	97.791	97.943
Si	2.9345	2.98172	2.96709	2.92945	3.00524	2.96516	2.96548	2.96143	2.93569	2.9586
Ti	b.d.l.	b.d.l.	b.d.l.	b.d.l.	b.d.l.	b.d.l.	0.00930017	b.d.l.	b.d.l.	0.00151145
Al	1.04377	1.01109	1.00893	1.0483	0.989206	1.0177	1.00587	0.996052	1.00417	0.994633
Cr	b.d.l.	b.d.l.	b.d.l.	b.d.l.	b.d.l.	b.d.l.	b.d.l.	b.d.l.	b.d.l.	b.d.l.
Fe	b.d.l.	b.d.l.	b.d.l.	b.d.l.	b.d.l.	b.d.l.	b.d.l.	b.d.l.	b.d.l.	b.d.l.
Mn	b.d.l.	b.d.l.	b.d.l.	b.d.l.	b.d.l.	b.d.l.	b.d.l.	b.d.l.	b.d.l.	b.d.l.
Mg	b.d.l.	b.d.l.	b.d.l.	b.d.l.	b.d.l.	b.d.l.	b.d.l.	b.d.l.	b.d.l.	b.d.l.
Ca	0.080952	0.0416629	0.0545061	0.0948749	0.0165601	0.0426598	0.0441519	0.0485229	0.0379429	0.0233527
Na	0.922732	0.911601	0.880237	0.88848	0.963944	0.932527	0.961812	0.940719	1.00377	0.95959
K	0.0141141	0.0512305	0.0849506	0.0370375	0.0226499	0.0397575	0.0107649	0.0399594	0.0151163	0.0516804
An (%)	7.95	4.14	5.34	9.29	1.65	4.2	4.34	4.71	3.59	2.25
Ab (%)	90.65	90.75	86.32	87.07	96.09	91.87	94.59	91.4	94.97	92.74
Or (%)	1.38	5.1	8.33	3.62	2.25	3.91	1.05	3.88	1.43	4.99
Matrix - K-feldspar	1		2		3		4		5		6		7		8		9		10		11
	Core	Rim	Core	Rim	Core	Rim	Core	Rim	Core	Rim	Core	Rim	Core	Rim	Core	Rim	Core	Rim	Core	Rim	Core	Rim
SiO2	64.123	62.937	62.996	62.849	63.483	62.764	62.595	63.269	62.631	62.891	62.659	62.567	61.025	61.854	62.33	62.414	61.919	61.751	62.585	62.882	62.848	62.584
TiO2	0.014	0.04	b.d.l.	b.d.l.	0.099	0.242	0.084	b.d.l.	b.d.l.	b.d.l.	0.183	0.103	0.108	b.d.l.	b.d.l.	b.d.l.	0.035	0.172	b.d.l.	b.d.l.	0.054	0
Al2O3	18.131	17.259	17.666	17.168	17.69	17.515	17.483	17.595	17.463	17.69	17.359	17.293	17.245	17.292	17.213	17.082	17.28	17.503	17.283	17.186	17.419	17.292
Cr2O3	b.d.l.	0.04	b.d.l.	b.d.l.	b.d.l.	b.d.l.	0.01	b.d.l.	b.d.l.	b.d.l.	b.d.l.	b.d.l.	b.d.l.	b.d.l.	0.01	b.d.l.	0.04	0.05	0.01	0.02	b.d.l.	b.d.l.
FeO	b.d.l.	b.d.l.	0.007	0.005	b.d.l.	0.031	0.032	b.d.l.	0.005	b.d.l.	0.053	0.061	b.d.l.	0.012	0.173	b.d.l.	0.025	b.d.l.	0.049	0.026	0.035	0.024
MnO	b.d.l.	0.059	0.031	0.078	b.d.l.	0.106	b.d.l.	0.12	0.005	b.d.l.	0.029	b.d.l.	b.d.l.	b.d.l.	0.027	0.059	b.d.l.	0.082	b.d.l.	b.d.l.	b.d.l.	0
MgO	0.005	0.008	b.d.l.	b.d.l.	b.d.l.	b.d.l.	0.024	0.032	0.018	0.011	b.d.l.	0.007	0.012	b.d.l.	b.d.l.	b.d.l.	b.d.l.	b.d.l.	b.d.l.	b.d.l.	b.d.l.	b.d.l.
CaO	b.d.l.	0.087	0.02	0.043	0.052	b.d.l.	0.013	0.027	b.d.l.	0.006	b.d.l.	0.02	0.007	b.d.l.	b.d.l.	0.011	0.014	b.d.l.	0.021	0.071	0.059	0.011
Na2O	0.378	0.95	0.553	0.467	0.732	0.23	0.398	0.219	0.322	0.237	0.287	0.419	0.366	0.309	0.246	0.213	0.286	0.394	0.203	0.975	0.85	0.328
K2O	15.961	15.943	15.933	15.281	15.019	16.062	16.012	16.367	16.025	16.37	16.295	15.717	15.66	16.111	16.306	16.4	15.838	15.799	16.008	15.244	15.213	16.15
Total	98.612	97.323	97.206	95.891	97.075	96.953	96.651	97.629	96.469	97.209	96.865	96.187	94.423	95.579	96.307	96.179	95.437	95.754	96.16	96.408	96.478	96.389
Si	3.00752	2.97784	2.99216	3.03329	3.02181	2.99891	62.595	2.99885	3.002	2.9917	2.9932	3.00886	2.98722	2.99107	2.99452	3.00232	3.00175	2.98194	3.01346	3.006	3.00517	3.00207
Ti	b.d.l.	b.d.l.	b.d.l.	b.d.l.	b.d.l.	0.00869539	0.084	b.d.l.	b.d.l.	b.d.l.	0.00657392	b.d.l.	b.d.l.	b.d.l.	b.d.l.	b.d.l.	b.d.l.	0.00624604	b.d.l.	b.d.l.	b.d.l.	b.d.l.
Al	1.00224	0.962424	0.988929	0.976541	0.992413	0.986322	17.483	0.982899	0.986497	0.991773	0.977312	0.980127	0.994896	0.985507	0.974637	0.968432	0.987303	0.996148	0.980775	0.968263	0.981651	0.977594
Cr	b.d.l.	b.d.l.	b.d.l.	b.d.l.	b.d.l.	b.d.l.	0.01	b.d.l.	b.d.l.	b.d.l.	b.d.l.	b.d.l.	b.d.l.	b.d.l.	b.d.l.	b.d.l.	b.d.l.	b.d.l.	b.d.l.	b.d.l.	b.d.l.	b.d.l.
Fe	b.d.l.	b.d.l.	b.d.l.	b.d.l.	b.d.l.	b.d.l.	0.032	b.d.l.	b.d.l.	b.d.l.	b.d.l.	b.d.l.	b.d.l.	b.d.l.	b.d.l.	b.d.l.	b.d.l.	b.d.l.	b.d.l.	b.d.l.	b.d.l.	b.d.l.
Mn	b.d.l.	b.d.l.	b.d.l.	b.d.l.	b.d.l.	b.d.l.	b.d.l.	b.d.l.	b.d.l.	b.d.l.	b.d.l.	b.d.l.	b.d.l.	b.d.l.	b.d.l.	b.d.l.	b.d.l.	b.d.l.	b.d.l.	b.d.l.	b.d.l.	b.d.l.
Mg	b.d.l.	b.d.l.	b.d.l.	b.d.l.	b.d.l.	b.d.l.	0.024	b.d.l.	b.d.l.	b.d.l.	b.d.l.	b.d.l.	b.d.l.	b.d.l.	b.d.l.	b.d.l.	b.d.l.	b.d.l.	b.d.l.	b.d.l.	b.d.l.	b.d.l.
Ca	b.d.l.	b.d.l.	b.d.l.	b.d.l.	b.d.l.	b.d.l.	0.013	b.d.l.	b.d.l.	b.d.l.	b.d.l.	b.d.l.	b.d.l.	b.d.l.	b.d.l.	b.d.l.	b.d.l.	b.d.l.	b.d.l.	b.d.l.	b.d.l.	b.d.l.
Na	0.0343743	0.0871496	0.0509264	0.0436997	0.0675565	0.0213073	0.398	0.0201259	0.0299243	0.0218587	0.0265816	0.0390676	0.0347366	0.028971	0.0229146	0.0198656	0.0268821	0.0368892	0.0189512	0.0903679	0.0788032	0.0305055
K	0.955022	0.962329	0.965445	0.94086	0.912029	0.979064	16.012	0.989673	0.979891	0.993427	0.993038	0.964238	0.977933	0.993894	0.999393	1.00641	0.979512	0.973293	0.983309	0.929652	0.928008	0.9883
An (%)	0	0.41	0.1	0.22	0.26	0.01	0.06	0.13	0	0.03	0	0.1	0.03	0	0.01	0.05	0.07	0	0.1	0.355	0.299	0.05
Ab (%)	3.47	8.26	5	4.42	6.87	2.12	3.63	1.99	2.96	2.15	2.6	3.88	3.42	2.83	2.24	1.93	2.66	3.65	1.88	8.82	7.8	2.99
Or (%)	96.52	91.31	94.89	95.34	92.85	97.86	96.29	97.87	97.03	97.81	97.39	96	96.53	97.16	97.74	98.01	97.25	96.34	98	90.81	91.89	96.95
Clast - K-feldspar	1	2	3	4	5	6	7	8	9	10	11	12	13	14	15	16	17	18	19	20	21	22	23	24	25	26	27	28	29	30	31	32	33	34	35
SiO2	64.892	64.867	64.833	64.598	64.287	64.977	64.467	65.34	63.649	63.629	64.528	63.938	64.104	64.032	64.278	64.47	63.91	63.38	63.667	64.279	63.588	64.427	63.799	63.655	63.879	63.677	63.465	61.274	64.732	64.283	64.252	63.871	60.925	65.601	56.683
TiO2	b.d.l.	b.d.l.	0.099	0.005	b.d.l.	b.d.l.	b.d.l.	0.035	b.d.l.	b.d.l.	0.01	0.124	b.d.l.	b.d.l.	0.212	b.d.l.	0.078	0.059	b.d.l.	b.d.l.	0.218	b.d.l.	b.d.l.	b.d.l.	0.119	0.073	b.d.l.	b.d.l.	0.119	b.d.l.	b.d.l.	0.04	0.173	b.d.l.	0.089
Al2O3	17.779	18.048	18.024	17.878	17.63	17.558	17.628	17.879	17.922	18.014	18.567	18.238	17.943	18.219	18.234	18.256	17.83	17.718	18.308	17.908	17.895	18.285	18.211	18.228	18.064	18.212	18.347	17.357	18.186	18.31	18.324	18.242	17.145	18.834	15.633
Cr2O3	b.d.l.	0.01	b.d.l.	b.d.l.	b.d.l.	b.d.l.	0.06	0.06	0.04	b.d.l.	b.d.l.	0.06	0.03	b.d.l.	b.d.l.	b.d.l.	b.d.l.	0.02	b.d.l.	b.d.l.	b.d.l.	b.d.l.	0.12	b.d.l.	0.11	0.04	b.d.l.	0.03	0.11	0.01	b.d.l.	0.08	b.d.l.	0.02	b.d.l.
FeO	0.039	0	0.05	0.091	0.049	0.006	0.054	0.036	b.d.l.	b.d.l.	0.191	0.03	0.018	b.d.l.	0.051	b.d.l.	0.018	0.038	0.035	b.d.l.	0.049	0.044	b.d.l.	b.d.l.	0.015	b.d.l.	b.d.l.	b.d.l.	0.027	0.005	b.d.l.	0.007	b.d.l.	b.d.l.	0.073
MnO	0.008	b.d.l.	b.d.l.	0.061	0.109	b.d.l.	0.086	0.011	0.113	b.d.l.	b.d.l.	0.035	b.d.l.	b.d.l.	0.073	b.d.l.	b.d.l.	0.075	0.045	b.d.l.	0.014	0.038	b.d.l.	0.066	0.043	0.067	0.016	0.031	b.d.l.	b.d.l.	0.016	0.012	b.d.l.	b.d.l.	0.066
MgO	b.d.l.	0.009	0.007	b.d.l.	0.01	0.014	0.033	b.d.l.	b.d.l.	0.01	b.d.l.	0.039	b.d.l.	b.d.l.	0.005	b.d.l.	b.d.l.	b.d.l.	b.d.l.	0.005	b.d.l.	0.011	0.01	0	b.d.l.	b.d.l.	b.d.l.	b.d.l.	b.d.l.	b.d.l.	b.d.l.	0.008	0.01	b.d.l.	0.008
CaO	0.052	0.04	0.006	b.d.l.	b.d.l.	0.046	0.04	0.023	0.007	0.039	0.101	0.022	0.009	0.06	0.101	0.026	b.d.l.	0.018	0.037	b.d.l.	b.d.l.	0.009	0.025	0.033	b.d.l.	0.006	0.024	0.029	b.d.l.	0.015	b.d.l.	0.031	b.d.l.	0.019	b.d.l.
Na2O	1.068	2.239	0.915	0.338	0.243	0.236	0.338	0.279	0.408	1.282	4.56	1.908	0.605	0.752	1.573	0.267	0.377	0.311	0.484	0.451	0.483	0.454	1.247	0.486	0.396	0.591	0.459	0.363	0.434	0.514	0.465	1.635	0.383	0.624	0.237
K2O	14.929	12.744	15.347	16.005	16.192	16.674	16.27	15.119	16.036	14.462	9.741	14.082	15.354	15.461	14.186	16.132	16.37	16.314	15.876	15.954	15.67	14.712	15.437	15.931	15.991	15.675	15.922	15.756	15.864	15.812	16.126	14.229	14.805	15.792	15.273
Total	98.767	97.957	99.281	98.976	98.524	99.514	98.976	98.782	98.175	97.436	97.698	98.476	98.063	98.524	98.713	99.151	98.584	97.933	98.453	98.597	97.918	97.98	98.849	98.399	98.617	98.341	98.234	94.84	99.472	98.951	99.184	98.155	93.441	100.89	88.062
Si	3.03072	3.03682	3.01377	3.02217	3.02256	3.02283	3.01496	3.07112	2.99793	3.00557	2.98868	2.97735	3.02206	2.99914	2.99539	3.00948	2.99728	2.9938	2.98781	3.01441	3.00444	3.04703	2.96713	2.98863	2.99727	2.99139	2.98431	2.98561	3.01236	3.00213	2.99301	2.98889	3.01889	3.00397	2.97558
Ti	b.d.l.	b.d.l.	b.d.l.	b.d.l.	b.d.l.	b.d.l.	b.d.l.	b.d.l.	b.d.l.	b.d.l.	b.d.l.	b.d.l.	b.d.l.	b.d.l.	0.00742929	b.d.l.	b.d.l.	b.d.l.	b.d.l.	b.d.l.	0.00774578	b.d.l.	b.d.l.	b.d.l.	b.d.l.	b.d.l.	b.d.l.	b.d.l.	b.d.l.	b.d.l.	b.d.l.	b.d.l.	0.00644642	b.d.l.	b.d.l.
Al	0.978629	0.995817	0.987462	0.985769	0.97692	0.962686	0.971635	0.990413	0.994884	1.00285	1.01351	1.00093	0.99694	1.00573	1.00145	1.00437	0.98552	0.986374	1.01259	0.989772	0.996495	1.0192	0.998187	1.00864	0.998934	1.00833	1.01679	0.996751	0.997425	1.00781	1.006	1.00608	1.00125	1.01644	0.9672
Cr	b.d.l.	b.d.l.	b.d.l.	b.d.l.	b.d.l.	b.d.l.	b.d.l.	b.d.l.	b.d.l.	b.d.l.	b.d.l.	b.d.l.	b.d.l.	b.d.l.	b.d.l.	b.d.l.	b.d.l.	b.d.l.	b.d.l.	b.d.l.	b.d.l.	b.d.l.	b.d.l.	b.d.l.	b.d.l.	b.d.l.	b.d.l.	b.d.l.	b.d.l.	b.d.l.	b.d.l.	b.d.l.	b.d.l.	b.d.l.	b.d.l.
Fe	b.d.l.	b.d.l.	b.d.l.	b.d.l.	b.d.l.	b.d.l.	b.d.l.	b.d.l.	b.d.l.	b.d.l.	0.0073981	b.d.l.	b.d.l.	b.d.l.	b.d.l.	b.d.l.	b.d.l.	b.d.l.	b.d.l.	b.d.l.	b.d.l.	b.d.l.	b.d.l.	b.d.l.	b.d.l.	b.d.l.	b.d.l.	b.d.l.	b.d.l.	b.d.l.	b.d.l.	b.d.l.	b.d.l.	b.d.l.	b.d.l.
Mn	b.d.l.	b.d.l.	b.d.l.	b.d.l.	b.d.l.	b.d.l.	b.d.l.	b.d.l.	b.d.l.	b.d.l.	b.d.l.	b.d.l.	b.d.l.	b.d.l.	b.d.l.	b.d.l.	b.d.l.	b.d.l.	b.d.l.	b.d.l.	b.d.l.	b.d.l.	b.d.l.	b.d.l.	b.d.l.	b.d.l.	b.d.l.	b.d.l.	b.d.l.	b.d.l.	b.d.l.	b.d.l.	b.d.l.	b.d.l.	b.d.l.
Mg	b.d.l.	b.d.l.	b.d.l.	b.d.l.	b.d.l.	b.d.l.	b.d.l.	b.d.l.	b.d.l.	b.d.l.	b.d.l.	b.d.l.	b.d.l.	b.d.l.	b.d.l.	b.d.l.	b.d.l.	b.d.l.	b.d.l.	b.d.l.	b.d.l.	b.d.l.	b.d.l.	b.d.l.	b.d.l.	b.d.l.	b.d.l.	b.d.l.	b.d.l.	b.d.l.	b.d.l.	b.d.l.	b.d.l.	b.d.l.	b.d.l.
Ca	b.d.l.	b.d.l.	b.d.l.	b.d.l.	b.d.l.	b.d.l.	b.d.l.	b.d.l.	b.d.l.	b.d.l.	b.d.l.	b.d.l.	b.d.l.	b.d.l.	b.d.l.	b.d.l.	b.d.l.	b.d.l.	b.d.l.	b.d.l.	b.d.l.	b.d.l.	b.d.l.	b.d.l.	b.d.l.	b.d.l.	b.d.l.	b.d.l.	b.d.l.	b.d.l.	b.d.l.	b.d.l.	b.d.l.	b.d.l.	b.d.l.
Na	0.0967104	0.203234	0.0824673	0.0306594	0.0221516	0.0212869	0.0306484	0.0254254	0.0372595	0.117411	0.409489	0.172265	0.0552994	0.0682911	0.142124	0.0241653	0.0342805	0.0284825	0.0440383	0.0410068	0.0442468	0.0416305	0.112444	0.0442408	0.0360254	0.0538301	0.0418475	0.0342933	0.0391583	0.0465419	0.0419973	0.148344	0.0367957	0.0554009	0.024122
K	0.889497	0.76113	0.910114	0.955245	0.971203	0.989583	0.970712	0.906565	0.963573	0.871483	0.575563	0.836553	0.923418	0.923837	0.843353	0.960683	0.979413	0.983083	0.950469	0.954466	0.944529	0.887645	0.915891	0.954205	0.957197	0.939413	0.955137	0.979401	0.941799	0.942062	0.958312	0.849452	0.935876	0.92253	1.02282
An (%)	0.26	0.2	0.03	0	0.02	0.22	0.199	0.12	0.03	0.199	0.5	0.1	0.04	0.3	0.5	0.13	0	0.08	0.18	0	0.05	0.04	0.12	0.16	0	0.03	0.12	0.14	0	0.07	0	0.15	0	0.09	0
Ab (%)	9.78	21.03	8.3	3.1	2.22	2.1	3.05	2.72	3.72	11.84	41.35	17.05	5.64	6.86	14.34	2.45	3.38	2.81	4.41	4.11	4.47	4.47	10.92	4.42	3.62	5.41	4.19	3.37	3.99	4.7	4.19	14.84	3.78	5.65	2.3
Or (%)	89.95	78.76	91.64	96.89	97.75	97.67	96.74	97.15	96.24	87.95	58.13	82.83	94.3	92.83	85.14	97.41	96.61	97.09	95.39	95.88	95.52	95.47	88.95	95.41	96.37	94.55	95.68	96.47	96	95.21	95.79	85	96.21	94.24	97.69
Clast - Plagioclase	1	2	3	4	5	6	7	8	9	10	11	12	13	14	15	16	17	18	19	20	21	22	23	24
SiO2	63.776	64.047	64.299	64.483	64.833	64.271	58.082	64.684	65.141	64.155	64.495	63.655	63.033	68.923	64.636	64.582	67.017	68.669	66.944	66.495	66.5	65.943	64.583	65.553
TiO2	0.118	b.d.l.	0.014	0.035	0.122	0.098	b.d.l.	b.d.l.	0.059	b.d.l.	0.049	b.d.l.	0.488	0.005	b.d.l.	b.d.l.	b.d.l.	b.d.l.	b.d.l.	0.005	b.d.l.	0.051	0.254	0
Al2O3	20.411	21.127	20.983	21.144	20.986	21.312	19.241	20.839	21.312	21.317	21.717	21.642	17.857	19.482	21.345	20.883	18.285	18.07	16.526	20.337	18.035	17.392	18.094	21.2
Cr2O3	0.01	b.d.l.	0.01	0.05	0.09	b.d.l.	0.06	b.d.l.	0.03	b.d.l.	b.d.l.	0.01	b.d.l.	b.d.l.	0.04	0.01	0.01	0.04	b.d.l.	b.d.l.	0.19	0.05	b.d.l.	b.d.l.
FeO	0.119	0.111	0.075	0.031	b.d.l.	0.083	0.104	0.079	0.067	0.083	0.033	0.013	0.014	0.006	0.061	0.078	b.d.l.	0.014	0.005	0.001	b.d.l.	b.d.l.	0.019	0.067
MnO	b.d.l.	b.d.l.	b.d.l.	0.036	0.038	b.d.l.	b.d.l.	b.d.l.	b.d.l.	b.d.l.	b.d.l.	0.025	b.d.l.	b.d.l.	b.d.l.	0.029	0.036	0.009	0	b.d.l.	b.d.l.	0.009	b.d.l.	b.d.l.
MgO	0.009	0	0.015	0.014	b.d.l.	0.018	b.d.l.	0.028	b.d.l.	b.d.l.	b.d.l.	0.038	0.008	0.006	b.d.l.	b.d.l.	b.d.l.	b.d.l.	0.007	0.014	b.d.l.	b.d.l.	0.019	0.023
CaO	3.752	3.74	3.597	3.867	3.487	3.795	7.084	3.43	3.379	3.862	4.332	4.229	0.836	1.165	3.534	3.588	2.212	0.352	0.029	2.456	0.425	0.06	0.488	4.23
Na2O	9.043	8.809	9.144	9.16	9.126	8.898	8.221	9.103	9.307	8.95	8.719	8.877	4.038	10.308	9.295	9.001	10.137	10.288	0.543	9.653	4.103	0.558	3.464	9.265
K2O	0.072	0.068	0.108	0.076	0.139	0.059	0.143	0.088	0.061	0.097	0.164	0.125	11.69	0.083	0.091	0.094	0.069	0.495	15.918	0.117	10.371	16.141	11.217	0.105
Total	97.315	97.908	98.249	98.897	98.821	98.534	92.95	98.265	99.356	98.466	99.511	98.614	97.966	99.983	99.003	98.279	97.766	97.937	99.977	99.082	99.628	100.215	98.147	100.448
Si	2.90947	2.90769	2.90367	2.89291	2.91537	2.89831	2.78059	2.92176	2.90683	2.89401	2.88688	2.86733	3.38172	3.04586	2.89368	2.91947	3.02889	3.11168	3.82424	2.97274	3.45205	3.76016	3.45756	2.89722
Ti	b.d.l.	b.d.l.	b.d.l.	b.d.l.	b.d.l.	b.d.l.	b.d.l.	b.d.l.	b.d.l.	b.d.l.	b.d.l.	b.d.l.	0.0196884	b.d.l.	b.d.l.	b.d.l.	b.d.l.	b.d.l.	b.d.l.	b.d.l.	b.d.l.	b.d.l.	0.010226	b.d.l.
Al	1.09743	1.13043	1.11677	1.11797	1.1122	1.13269	1.08562	1.10938	1.12084	1.13332	1.14567	1.14894	1.1291	1.01469	1.12623	1.11261	0.973977	0.965045	1.11265	1.07154	1.10338	1.16881	1.14167	1.10428
Cr	b.d.l.	b.d.l.	b.d.l.	b.d.l.	b.d.l.	b.d.l.	b.d.l.	b.d.l.	b.d.l.	b.d.l.	b.d.l.	b.d.l.	b.d.l.	b.d.l.	b.d.l.	b.d.l.	b.d.l.	b.d.l.	b.d.l.	b.d.l.	0.00779802	b.d.l.	b.d.l.	b.d.l.
Fe	b.d.l.	b.d.l.	b.d.l.	b.d.l.	b.d.l.	b.d.l.	b.d.l.	b.d.l.	b.d.l.	b.d.l.	b.d.l.	b.d.l.	b.d.l.	b.d.l.	b.d.l.	b.d.l.	b.d.l.	b.d.l.	b.d.l.	b.d.l.	0	b.d.l.	b.d.l.	b.d.l.
Mn	b.d.l.	b.d.l.	b.d.l.	b.d.l.	b.d.l.	b.d.l.	b.d.l.	b.d.l.	b.d.l.	b.d.l.	b.d.l.	b.d.l.	b.d.l.	b.d.l.	b.d.l.	b.d.l.	b.d.l.	b.d.l.	b.d.l.	b.d.l.	0.000175874	b.d.l.	b.d.l.	b.d.l.
Mg	b.d.l.	b.d.l.	b.d.l.	b.d.l.	b.d.l.	b.d.l.	b.d.l.	b.d.l.	b.d.l.	b.d.l.	b.d.l.	b.d.l.	b.d.l.	b.d.l.	b.d.l.	b.d.l.	b.d.l.	b.d.l.	b.d.l.	b.d.l.	0	b.d.l.	b.d.l.	b.d.l.
Ca	0.18339	0.181919	0.174037	0.185875	0.167999	0.183358	0.363356	0.165997	0.161552	0.186655	0.207753	0.204099	0.0480544	0.0551607	0.169512	0.173781	0.107113	0.0170897	0.00177496	0.11764	0.0236375	b.d.l.	0.0279917	0.200302
Na	0.799863	0.775396	0.800618	0.796767	0.795656	0.777981	0.763075	0.797222	0.805234	0.782778	0.756686	0.775279	0.420032	0.883217	0.806812	0.788916	0.888289	0.903881	0.0601423	0.836713	0.412956	0.0616906	0.359564	0.793927
K	b.d.l.	b.d.l.	b.d.l.	b.d.l.	b.d.l.	b.d.l.	b.d.l.	b.d.l.	b.d.l.	b.d.l.	b.d.l.	b.d.l.	b.d.l.	b.d.l.	b.d.l.	b.d.l.	b.d.l.	b.d.l.	b.d.l.	b.d.l.	b.d.l.	b.d.l.	b.d.l.	b.d.l.
An (%)	18.6459	18.9962	17.852	18.9147	17.4336	19.0732	32.231	17.2212	16.7102	19.2517	21.5414	20.8396	10.2631	5.87654	17.3623	0	10.7607	1.85562	2.8499	12.3237	5.41408	5.54083	7.21118	20.1408
Ab (%)	81.3245	80.9675	82.1244	81.0794	82.5664	80.9268	67.6877	82.7071	83.2898	80.7364	78.4586	79.1604	89.7076	94.0934	82.6377	96.99	89.2393	98.1444	96.565	87.6524	94.5859	93.2496	92.6305	79.8309
Or (%)	0.0295863	0.0362867	0.0236378	0.00582408	0	0	0.0812621	0.0717383	0	0.011871	0	0	0.0292351	0.0300308	0	3.01	0	0	0.585062	0.0238986	0	1.20953	0.158354	0.028347
Fracture - Plagioclase	1		2		3		4		5		6		7		8
	Core	Rim	Core	Rim	Core	Rim	Core	Rim	Core	Rim	Core	Rim	Core	Rim	Core	Rim
SiO2	66.132	64.005	63.846	65.576	65.707	64.107	63.721	64.515	64.842	64.569	64.972	66.167	65.733	64.973	64.199	68.518
TiO2	b.d.l.	b.d.l.	0.059	b.d.l.	0.088	b.d.l.	b.d.l.	b.d.l.	0.034	0.04	0.024	0.029	0.053	0	0.229	0.162
Al2O3	19.635	20.031	20.172	19.346	20.889	20.147	20.218	20.48	20.633	20.261	19.963	19.731	19.671	19.944	20.471	18.807
Cr2O3	b.d.l.	0.04	0.04	b.d.l.	0.05	b.d.l.	0.01	0.05	0.12	b.d.l.	0.02	0.04	b.d.l.	b.d.l.	0.01	b.d.l.
FeO	0.011	0.034	0.036	b.d.l.	0.048	0.044	b.d.l.	0.074	b.d.l.	0.08	b.d.l.	0.013	0.041	0.028	0.055	b.d.l.
MnO	b.d.l.	b.d.l.	0.096	b.d.l.	b.d.l.	0.039	b.d.l.	b.d.l.	0.011	b.d.l.	0.027	b.d.l.	b.d.l.	b.d.l.	b.d.l.	0.01
MgO	0.015	0.022	0	0.022	0.021	0.024	b.d.l.	b.d.l.	b.d.l.	b.d.l.	0.015	b.d.l.	0.008	b.d.l.	0.013	b.d.l.
CaO	1.011	1.507	1.418	1.147	1.952	1.361	1.7	1.843	1.555	1.45	1.237	1.417	0.576	1.143	1.832	1.468
Na2O	10.298	11.027	10.668	10.295	11.285	11.044	9.923	10.065	10.617	10.653	11.076	10.131	11.113	10.246	10.525	8.831
K2O	0.136	0.08	0.36	1.366	0.123	0.099	1.004	0.564	0.057	0.058	0.087	0.134	0.101	0.908	0.09	0.76
Total	97.238	96.746	96.695	97.752	100.163	96.865	96.581	97.594	97.873	97.111	97.421	97.662	97.296	97.242	97.424	98.556
Si	2.99164	2.88825	2.88975	2.94481	2.866	2.88889	2.8989	2.907	2.90462	2.91305	2.9138	2.98541	2.98541	2.93331	2.89041	3.10097
Ti	b.d.l.	b.d.l.	b.d.l.	b.d.l.	b.d.l.	b.d.l.	b.d.l.	b.d.l.	b.d.l.	b.d.l.	b.d.l.	b.d.l.	b.d.l.	b.d.l.	0.00775331	0.00551352
Al	1.04685	1.06532	1.07605	1.0239	1.07384	1.07002	1.08404	1.0876	1.08931	1.07731	1.05515	1.04922	1.04922	1.06119	1.08624	1.00316
Cr	b.d.l.	b.d.l.	b.d.l.	b.d.l.	b.d.l.	b.d.l.	b.d.l.	b.d.l.	b.d.l.	b.d.l.	b.d.l.	b.d.l.	b.d.l.	b.d.l.	b.d.l.	b.d.l.
Fe	b.d.l.	b.d.l.	b.d.l.	b.d.l.	b.d.l.	b.d.l.	b.d.l.	b.d.l.	b.d.l.	b.d.l.	b.d.l.	b.d.l.	b.d.l.	b.d.l.	b.d.l.	b.d.l.
Mn	b.d.l.	b.d.l.	b.d.l.	b.d.l.	b.d.l.	b.d.l.	b.d.l.	b.d.l.	b.d.l.	b.d.l.	b.d.l.	b.d.l.	b.d.l.	b.d.l.	b.d.l.	b.d.l.
Mg	b.d.l.	b.d.l.	b.d.l.	b.d.l.	b.d.l.	b.d.l.	b.d.l.	b.d.l.	b.d.l.	b.d.l.	b.d.l.	b.d.l.	b.d.l.	b.d.l.	b.d.l.	b.d.l.
Ca	0.0490012	0.0728605	0.0687638	0.0551866	0.0912227	0.0657114	0.0828622	0.0889749	0.0746312	0.0700889	0.0594376	0.0684998	0.0684998	0.0552877	0.0883719	0.0711832
Na	0.903229	0.964774	0.936173	0.896367	0.954363	0.964935	0.875266	0.879316	0.922107	0.931842	0.963083	0.88626	0.88626	0.896863	0.918756	0.774908
K	0.00784866	0.00460542	0.0207868	0.0782568	0.0068443	0.00569139	0.0582696	0.0324207	0.00325736	0.00333818	0.0049775	0.00771303	0.00771303	0.0522961	0.00516931	0.0438799
An (%)	5.1	6.99	6.7	5.35	8.66	6.34	8.15	8.89	7.46	6.97	5.78	7.11	2.76	5.5	8.72	7.99
Ab (%)	94.07	92.56	91.26	87.04	90.68	93.11	86.11	87.86	92.21	92.69	93.73	92.08	96.65	89.28	90.75	87.07
Or (%)	0.81	0.44	2.02	7.59	0.65	0.54	5.73	3.23	0.32	0.33	0.48	0.8	0.57	5.2	0.51	4.93
Fracture - K-Feldspar	1		2		3		4		5		6		7		8		9		10
	Core	Rim	Core	Rim	Core	Rim	Core	Rim	Core	Rim	Core	Rim	Core	Rim	Core	Rim	Core	Rim	Core	Rim
SiO2	61.213	66.916	59.734	62.477	62.937	61.946	62.284	63.327	63.454	62.639	63.137	61.847	62.864	62.538	62.572	62.068	62.538	62.721	63.644	63.302
TiO2	b.d.l.	0.088	0.044	0.158	b.d.l.	0.232	0.296	b.d.l.	b.d.l.	b.d.l.	b.d.l.	0.212	0.07	b.d.l.	0.016	0.089	0.059	0.049	0.035	b.d.l.
Al2O3	17.865	16.344	18.005	18.064	17.969	17.942	18.06	18.423	18.588	17.987	18.304	18.14	17.926	17.962	17.883	17.758	18.262	17.773	18.353	18.283
Cr2O3	b.d.l.	0.03	0.04	0.01	b.d.l.	b.d.l.	b.d.l.	b.d.l.	b.d.l.	0.01	b.d.l.	b.d.l.	0.08	b.d.l.	b.d.l.	b.d.l.	0.07	0.04	b.d.l.	b.d.l.
FeO	0.014	b.d.l.	b.d.l.	0.06	0.03	0.041	0.024	0.101	0.056	0.072	b.d.l.	0.025	0.009	b.d.l.	0.022	0.063	b.d.l.	0.008	0.027	0.038
MnO	b.d.l.	b.d.l.	b.d.l.	0.147	b.d.l.	0.058	0.055	b.d.l.	0.01	0.045	b.d.l.	b.d.l.	b.d.l.	b.d.l.	b.d.l.	0.016	0.064	b.d.l.	0.127	b.d.l.
MgO	b.d.l.	0.007	b.d.l.	0.015	b.d.l.	0.014	b.d.l.	0.016	0.022	b.d.l.	b.d.l.	b.d.l.	b.d.l.	b.d.l.	b.d.l.	b.d.l.	0.005	b.d.l.	b.d.l.	b.d.l.
CaO	0.086	0.25	0.031	0.26	0.046	0.022	0.013	0.073	0.312	0.186	0.124	0.094	b.d.l.	b.d.l.	0.113	b.d.l.	0.056	b.d.l.	0.041	0.139
Na2O	0.996	2.869	0.448	2.097	0.799	0.606	0.553	1.561	3.542	1.485	2.678	2.13	0.343	0.544	1.456	0.327	1.027	0.359	1.651	1.285
K2O	15.034	10.224	15.726	12.973	15.498	15.712	15.952	14.117	10.983	14.11	14.81	13.616	16.346	15.731	14.4	15.903	13.642	16.133	14.699	14.504
Total	95.208	96.728	94.032	96.261	97.279	96.573	97.237	97.618	96.967	96.534	99.053	96.064	97.64	96.775	96.462	96.224	95.723	97.084	98.58	97.551
Si	2.95765	3.18186	2.92846	2.97552	2.98253	2.96071	2.9576	2.97975	2.97452	2.98215	2.8981	2.94489	2.97552	2.98281	2.97981	2.98254	3.016	2.98611	2.96205	2.98524
Ti	b.d.l.	b.d.l.	b.d.l.	0.00565876	b.d.l.	0.00833856	0.01057	b.d.l.	b.d.l.	b.d.l.	b.d.l.	0.00759113	b.d.l.	b.d.l.	b.d.l.	b.d.l.	b.d.l.	b.d.l.	b.d.l.	b.d.l.
Al	1.01733	0.915936	1.04032	1.01394	1.00359	1.01067	1.01073	1.02166	1.02694	1.00925	0.990219	1.01799	1	1.0097	1.0037	1.0057	1.03798	0.997263	1.0067	1.01617
Cr	b.d.l.	b.d.l.	b.d.l.	b.d.l.	b.d.l.	b.d.l.	b.d.l.	b.d.l.	b.d.l.	b.d.l.	b.d.l.	b.d.l.	b.d.l.	b.d.l.	b.d.l.	b.d.l.	b.d.l.	b.d.l.	b.d.l.	b.d.l.
Fe	b.d.l.	b.d.l.	b.d.l.	b.d.l.	b.d.l.	b.d.l.	b.d.l.	b.d.l.	b.d.l.	b.d.l.	b.d.l.	b.d.l.	b.d.l.	b.d.l.	b.d.l.	b.d.l.	b.d.l.	b.d.l.	b.d.l.	b.d.l.
Mn	b.d.l.	b.d.l.	b.d.l.	0.01	b.d.l.	b.d.l.	b.d.l.	b.d.l.	b.d.l.	b.d.l.	b.d.l.	b.d.l.	b.d.l.	b.d.l.	b.d.l.	b.d.l.	b.d.l.	b.d.l.	0.01	b.d.l.
Mg	b.d.l.	b.d.l.	b.d.l.	b.d.l.	b.d.l.	b.d.l.	b.d.l.	b.d.l.	b.d.l.	b.d.l.	b.d.l.	b.d.l.	b.d.l.	b.d.l.	b.d.l.	b.d.l.	b.d.l.	b.d.l.	b.d.l.	b.d.l.
Ca	b.d.l.	0.0127365	b.d.l.	0.013267	b.d.l.	b.d.l.	b.d.l.	b.d.l.	0.0156701	0.00948758	0.0060983	b.d.l.	b.d.l.	b.d.l.	0.0057656	b.d.l.	b.d.l.	b.d.l.	b.d.l.	0.00702318
Na	0.093306	0.264502	0.0425836	0.193637	0.0734128	0.0561567	0.0509138	0.14241	0.321924	0.137075	0.238335	0.196642	0.0314777	0.0503069	0.134436	0.0304659	0.0960294	0.0331386	0.148981	0.117493
K	0.926694	0.620198	0.983545	0.788211	0.936942	0.958015	0.966355	0.847406	0.656807	0.856979	0.867248	0.8271	0.987033	0.957186	0.874841	0.974892	0.839312	0.979867	0.872734	0.872585
An (%)	0.43	1.41	0.15	1.33	0.23	0.11	0.06	0.37	1.57	0.94	0.54	0.46	0	0	0.56	0	0.3	0	0.199	0.7
Ab (%)	9.1	29.47	4.14	19.45	7.24	5.53	5	14.33	32.37	13.65	21.43	19.11	3.09	4.99	13.24	3.03	10.23	3.27	14.55	11.78
Or (%)	90.45	69.1	95.69	79.2	92.52	94.35	94.93	85.29	66.05	85.39	78.01	80.41	96.9	95	86.18	96.96	89.45	96.72	85.24	87.51
